# Supplementary material
Source: PubMed Central journal article supplement (PMC10840709)
Supplement: NIHMS1929421-supplement-1.pdf [file NIHMS1929421-supplement-1.pdf]

## Support Information for:

# Matrix-Augmented Pooling Strategy for High Throughput Target Deconvolution Reveals Cell-Specific Drug-Target Interactions

### Supplementary figure & captions

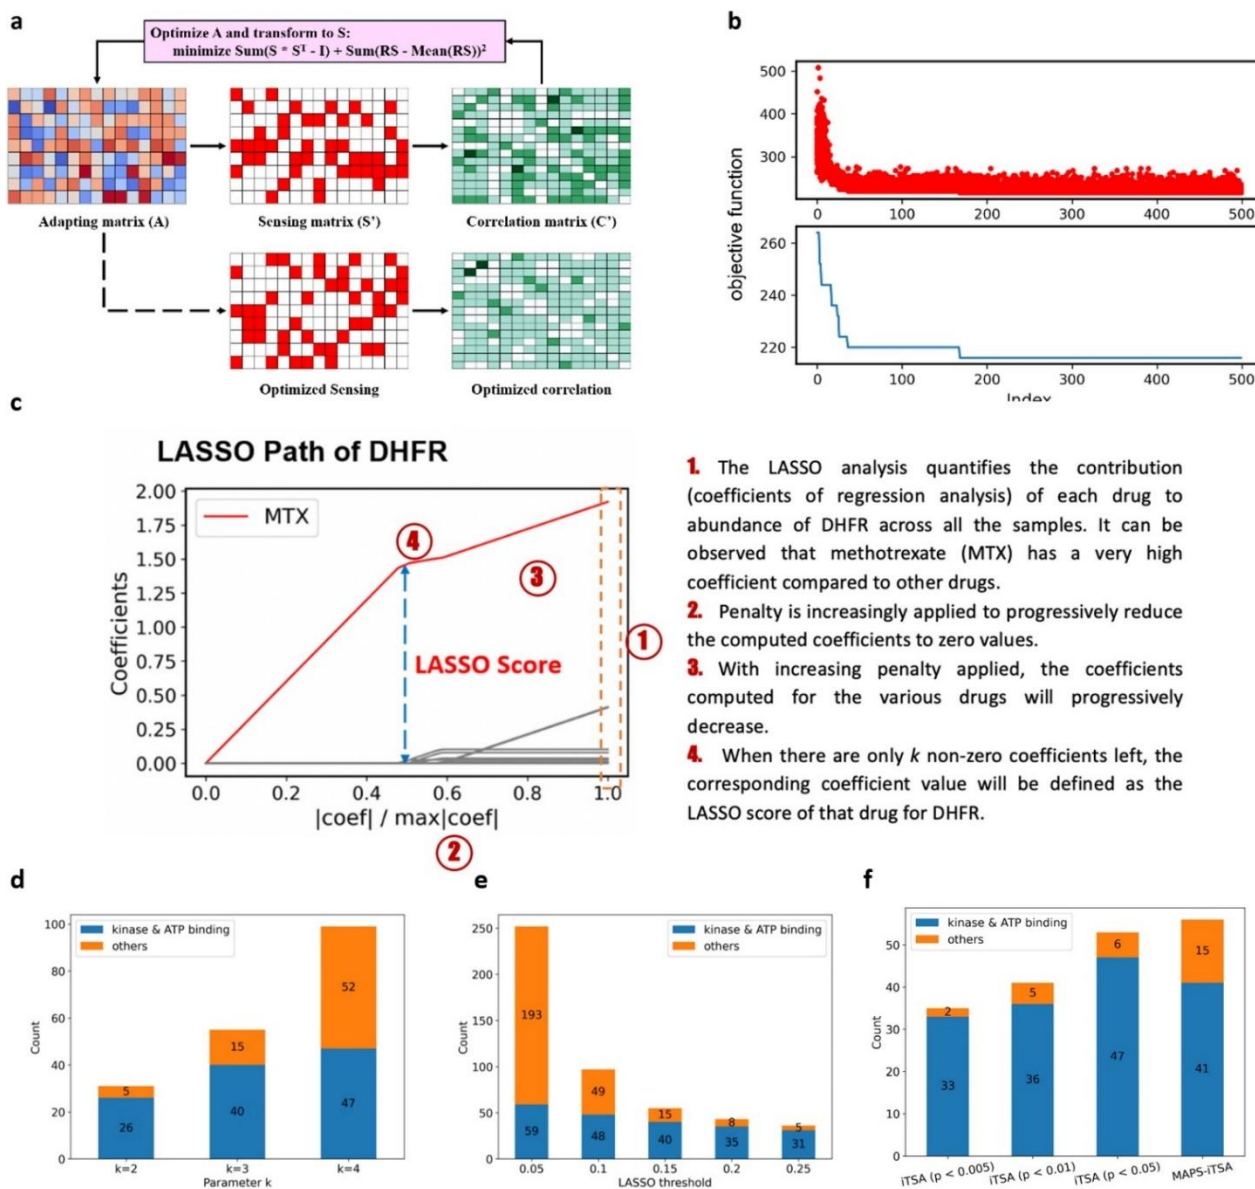

**Fig. S1. Conception description, parameter optimization, and performance comparison of MAPS-iTSA algorithm, Related to STAR Methods.** (a) The conceptual diagram of sensing matrix generation; (b) The result curve of optimization of genetic algorithm of sensing matrix generation; (c) The schematic diagram of how the LASSO score is computed. (d-e) The optimization results of the parameters of LASSO analysis based on kinase identification with HepG2 cell line. i.e., number of identified kinases and false positives with different parameter  $k$  (d), and number of identified kinases and false positives with different threshold of LASSO score (e); (f) Kinase identification performance comparison between MAPS-iTSA and iTSA with different p-value cutoff (Blue: Number of identified kinase and ATP-binding proteins, treated as true positive; Orange: Number of other identified proteins, treated as false positive).

## K562

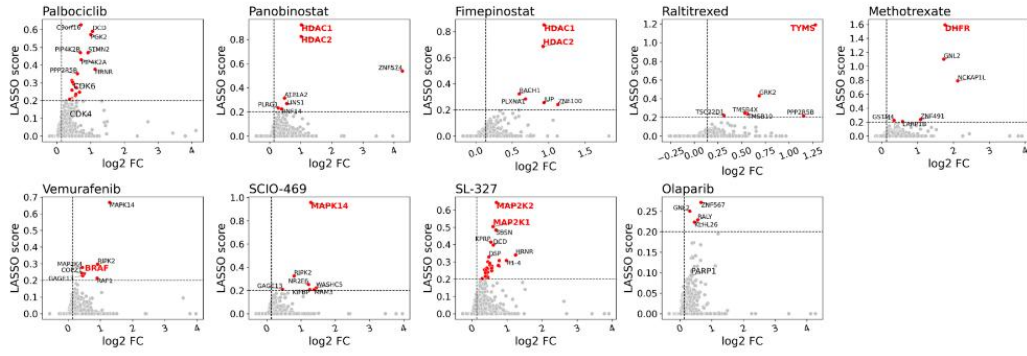

## 293T

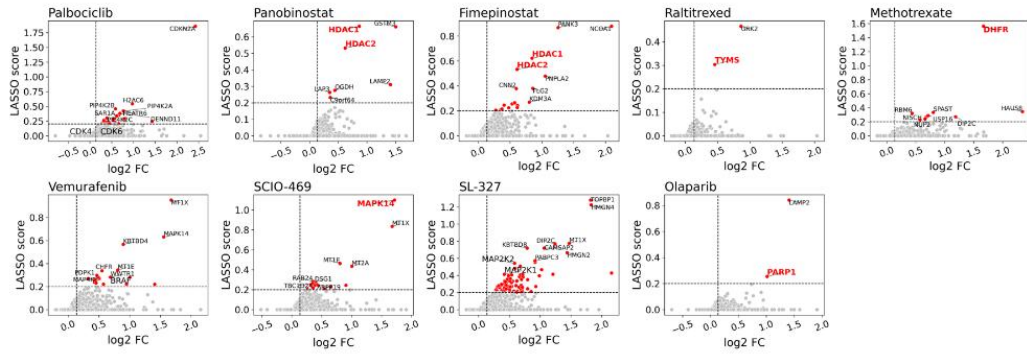

## HepG2

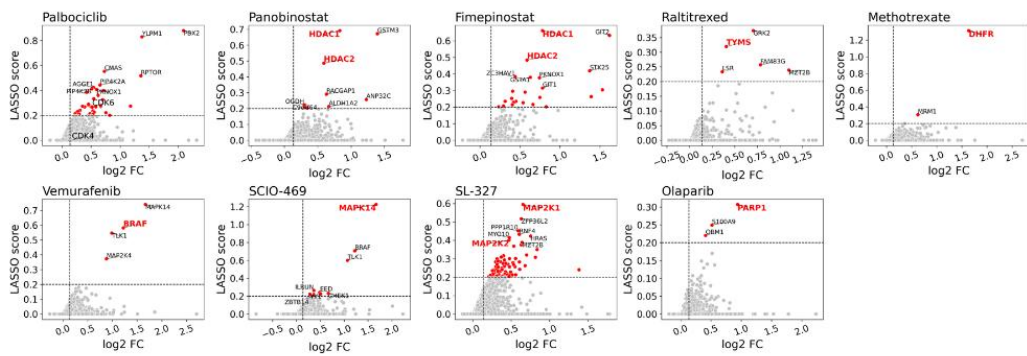

## HCT116

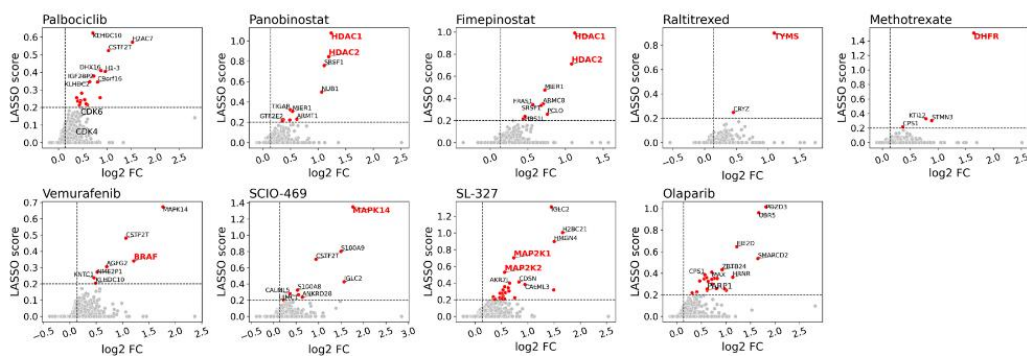

## MCF7

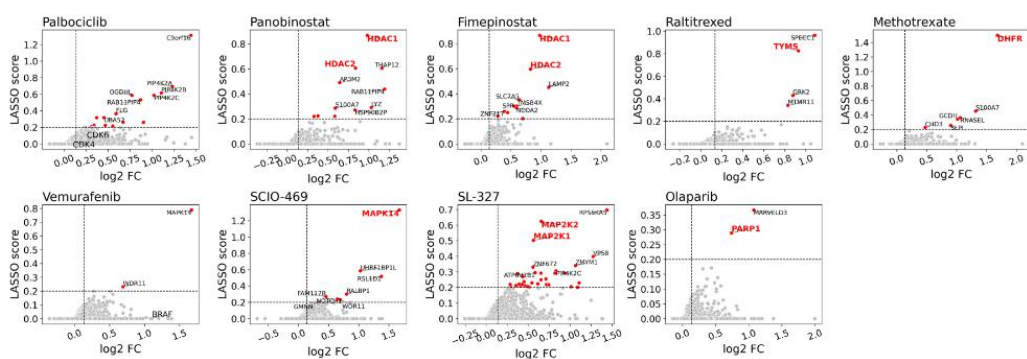

Fig. S2. Scatter plot of drug target deconvolution across cell-lines results of validation set, Related to Figure 2.

**K562**

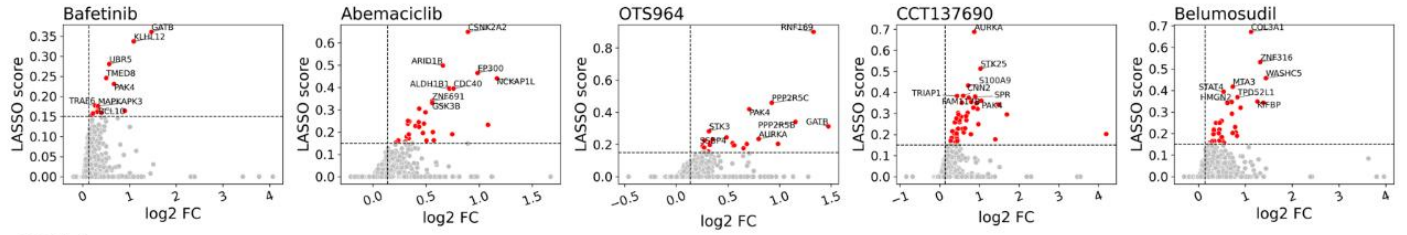

**293T**

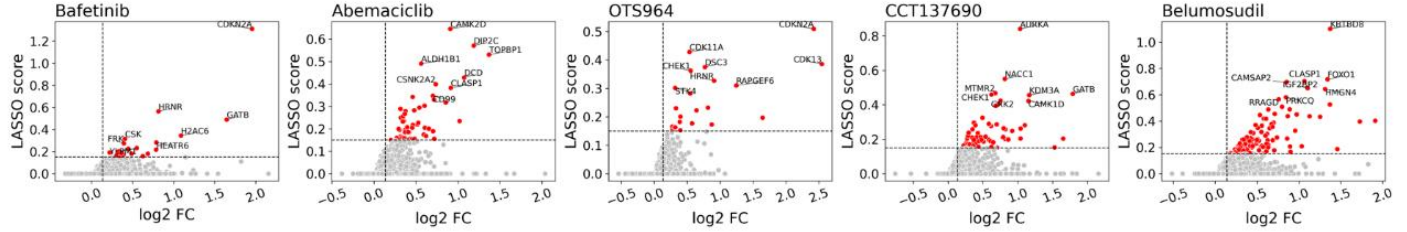

**HepG2**

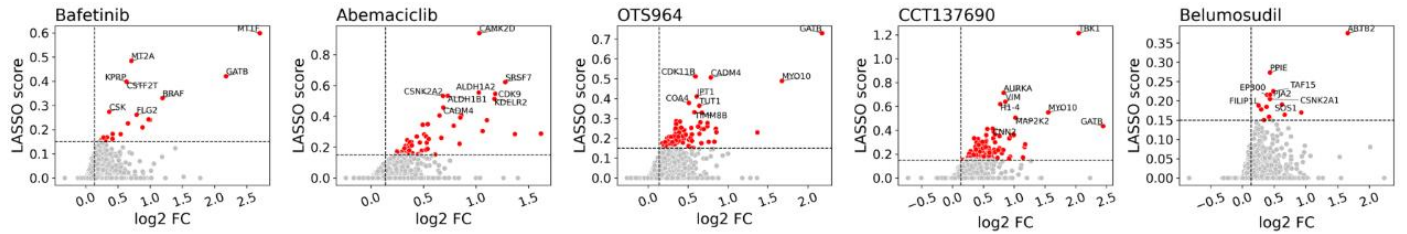

**HCT116**

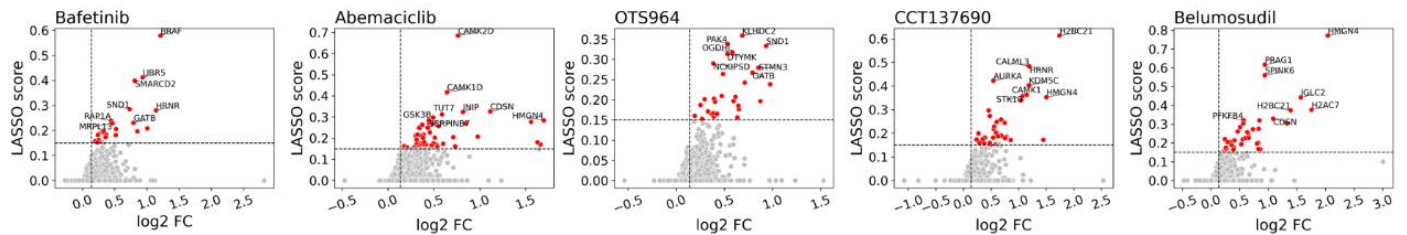

**MCF7**

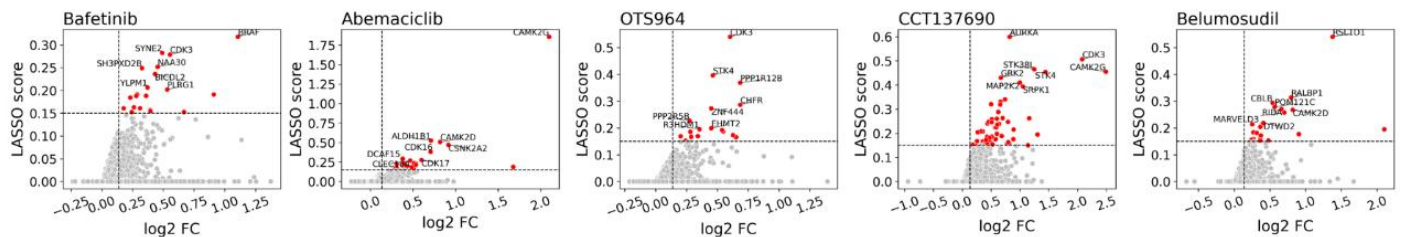

**Fig. S3. Scatter plot of drug target deconvolution across cell-lines results of exploratory set, Related to Figure 4.**

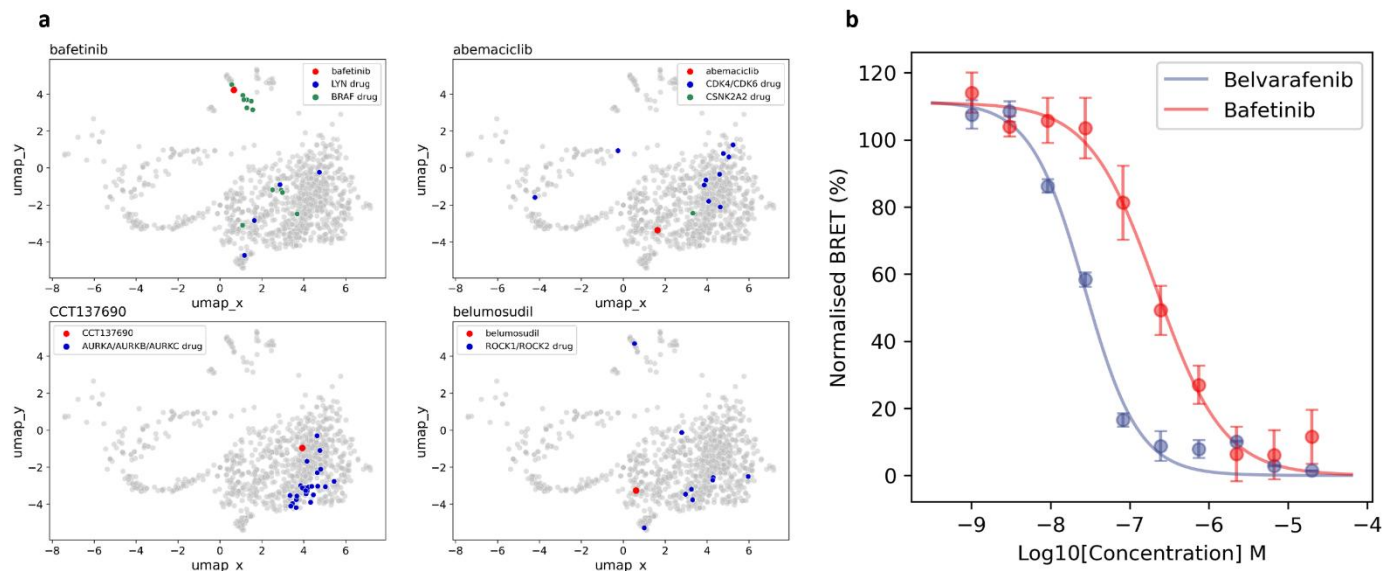

**Fig. S4. Basis of off-target drug speculation and verification, related to STAR Methods.** (a) U-map visualization of the drug response patterns of 578 cancerous cell lines, which indicates the selected exploratory drugs have the different killing profile from the other drugs with the same designed targets; (b) Dose-response curve for NanoBERT in-vitro off-target validation of bafetinib-BRAF V600E.

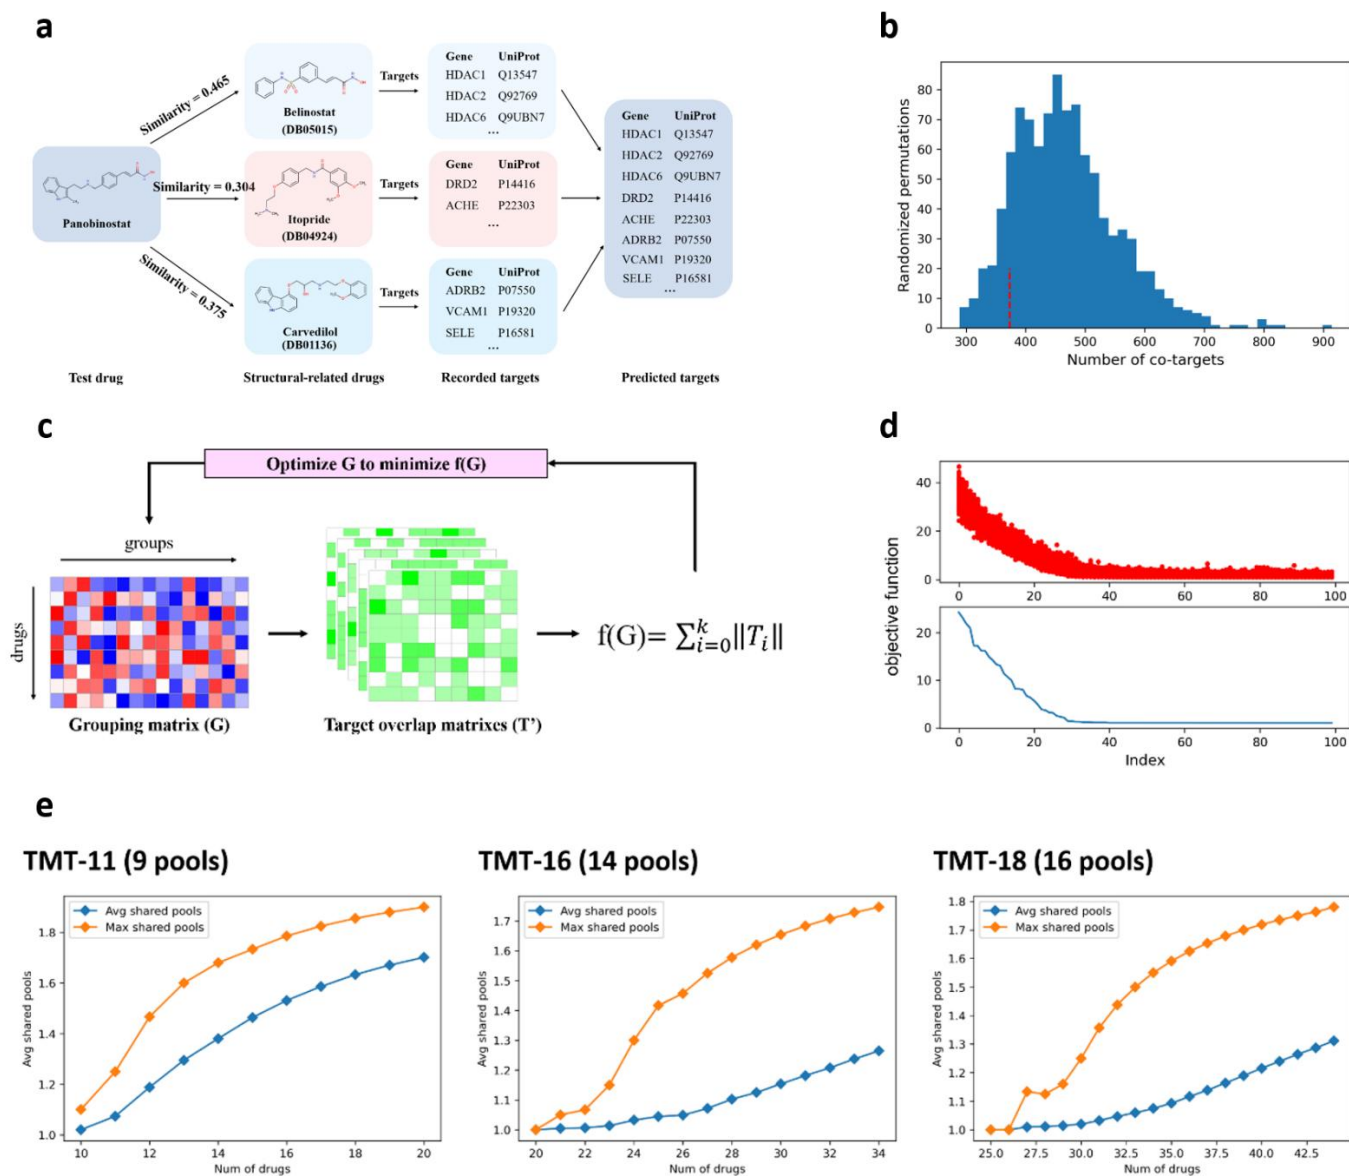

**Fig. S5. Concept and methods for promoting application prospects of MAPS-iTSA, related to STAR Methods.** (a) The schematic diagram of drug target prediction based on structural similarity used for drug grouping. (b) Comparison between the results of drug grouping algorithm and random grouping. The histogram represents the frequency distribution of the number of co-targets of random grouping. The red line indicates the number of co-targets achieved through the drug grouping method. Based on the results, it is evident that the optimized result outperforms the majority of random grouping situations. This suggests that the drug grouping algorithm is effective to reduce the co-targets within drug groups. (c) The conceptual diagram of drug grouping algorithm; (d) The result curve of optimization of genetic algorithm of drug grouping. (e) Scatter plots of different TMT channels between the number of test drugs and the shared pools per drug.

## Supplementary Tables

**Table S1.** List of drugs used in the experiments, related to STAR Methods.

| <b>PubChem</b> | <b>Drug</b>   | <b>Known target</b> | <b>Reference</b>                      | <b>Category</b> |
|----------------|---------------|---------------------|---------------------------------------|-----------------|
| 5330286        | Palbociclib   | CDK4, CDK6          | EMBO J. 37, 1–19 (2018)               | verification    |
| 6918837        | Panobinostat  | HDAC1, HDAC2        | Nat. Chem. Biol. 12, 908–910 (2016)   | verification    |
| 135400182      | Raltitrexed   | TYMS                | Science 341, 84–87 (2013)             | verification    |
| 126941         | Methotrexate  | DHFR                | Science 341, 84–87 (2013)             | verification    |
| 42611257       | Vemurafenib   | BRAF                | Science 346, 1255784 (2014)           | verification    |
| 54575456       | Fimepinostat  | HDAC1               | J. Med. Chem. 63, 4256–4292 (2020)    | verification    |
| 23725625       | Olaparib      | PARP1               | Science 341, 84–87 (2013)             | verification    |
| 11387605       | Bafetinib     | LYN                 | Nat. Cancer 1, 235–248 (2020)         | exploratory     |
| 9871074        | SCIO-469      | MAPK14              | Sci. Transl. Med. 11, eaaw8412 (2019) | exploratory     |
| 89675898       | OTS964        | TOPK                | Sci. Transl. Med. 11, eaaw8412 (2019) | exploratory     |
| 9549284        | SL-327        | MEK1, MEK2          | Nat. Cancer 1, 235–248 (2020)         | exploratory     |
| 46220502       | Abemaciclib   | CDK4, CDK6          | Nat. Cancer 1, 235–248 (2020)         | exploratory     |
| 25154041       | CCT137690     | AURKA, AURKB, AURKC | Nat. Cancer 1, 235–248 (2020)         | exploratory     |
| 11950170       | Belumosudil   | ROCK1, ROCK2        | Nat. Cancer 1, 235–248 (2020)         | exploratory     |
| 7251185        | Parthenolide  | NFKB1               | Nat. Cancer 1, 235–248 (2020)         | exploratory     |
| 3385           | Staurosporine | TYMS                | Science 341, 84–87 (2013)             | verification    |

**Table S2.** Sensing matrix of the 9\*15 experiment, related to STAR Methods.

| Pool ID | Palbociclib | Panobinostat | Raltitrexed | Methotrexate | Vemurafenib | Fimepinostat | Olaparib | Bafetinib | SCIO-469 | OTS964 | SL-327 | Abemaciclib | CCT137690 | Belumodesil | Staurosporine / Parthenolide |
|---------|-------------|--------------|-------------|--------------|-------------|--------------|----------|-----------|----------|--------|--------|-------------|-----------|-------------|------------------------------|
| 1       |             | √            | √           |              | √           |              |          |           | √        |        |        |             |           | √           |                              |
| 2       |             |              |             |              | √           | √            |          | √         | √        |        | √      |             |           |             |                              |
| 3       |             |              |             |              |             |              | √        |           | √        |        |        |             | √         | √           | √                            |
| 4       | √           |              |             | √            |             | √            |          |           |          |        |        | √           |           | √           |                              |
| 5       | √           | √            |             |              |             |              | √        | √         |          | √      |        |             |           |             |                              |
| 6       |             |              |             | √            | √           |              |          | √         |          |        |        |             | √         |             | √                            |
| 7       | √           |              | √           |              |             |              |          |           |          | √      | √      |             | √         |             |                              |
| 8       |             |              | √           |              |             | √            |          |           |          | √      |        | √           |           |             | √                            |
| 9       |             | √            |             | √            |             |              | √        |           |          |        | √      | √           |           |             |                              |

**Table S3.** Raw data of Nanobert in vitro validation, related to Figure 5.

|            |                | NanoBREAT BRAF     |            |            |                 |            |            |                   |            |            |
|------------|----------------|--------------------|------------|------------|-----------------|------------|------------|-------------------|------------|------------|
|            |                | Belvarafenib (mBU) |            |            | Bafetinib (mBU) |            |            | Abemaciclib (mBU) |            |            |
| Conc.      | Conc. (log 10) | Response 1         | Response 2 | Response 3 | Response 1      | Response 2 | Response 3 | Response 1        | Response 2 | Response 3 |
| 0          | #NUM!          | 3.91367133         | 4.15745458 | 3.70074564 | 4.29271532      | 5.0408172  | 3.3595527  | 4.44636131        | 3.88059691 | 4.20568858 |
| 1.016E-09  | -8.9931063     | 4.92645029         | 4.06562082 | 4.22605651 | 4.29018475      | 5.12624398 | 4.58617954 | 4.89076345        | 3.86630863 | 5.35594291 |
| 3.04E-09   | -8.5171264     | 6.41226044         | 4.1876454  | 3.80563734 | 4.37410354      | 4.70702356 | 4.26566459 | 4.99376502        | 3.71102745 | 4.5109384  |
| 9.14E-09   | -8.0390538     | 3.67631771         | 3.95867175 | 4.0162304  | 4.10877103      | 5.28617288 | 4.99312735 | 4.49045192        | 4.06233281 | 4.62495775 |
| 2.74E-08   | -7.5622494     | 5.64755568         | 3.42218132 | 3.64201137 | 3.90053621      | 5.48002447 | 4.32560794 | 4.20568345        | 4.17429005 | 4.89290655 |
| 8.24E-08   | -7.0840728     | 2.6234896          | 2.47884406 | 2.76955391 | 3.60372325      | 4.93595232 | 5.16750744 | 4.23085903        | 5.04005282 | 4.48608204 |
| 2.46E-07   | -6.6090649     | 1.97017143         | 1.400082   | 1.95155146 | 3.41564127      | 4.3101304  | 5.08324032 | 4.7155405         | 4.36087163 | 3.98765522 |
| 0.00000074 | -6.1307683     | 0.7726647          | 0.3566775  | 0.51964133 | 2.90107792      | 3.92976414 | 3.30299941 | 4.95897982        | 3.78074991 | 6.63864627 |
| 0.00000222 | -5.653647      | 1.77357143         | 0.55711707 | 0.98475173 | 2.24164584      | 2.73765951 | 2.72037654 | 4.67373743        | 4.18873093 | 5.99442342 |
| 0.00000666 | -5.1765258     | 0.27011649         | 0.0647367  | 0.643571   | 0.23528935      | 0.94095959 | 0.56072518 | 5.06167616        | 4.77996852 | 5.77392157 |
| 0.00002    | -4.69897       | 1.12021459         | 0.48017526 | 0.09472179 | 0.17752265      | 1.27839232 | 0.76452055 | 4.76435921        | 5.82758129 | 5.46516649 |



**(Continue) Table S3.** Raw data of Nanobert in vitro validation, related to Figure 5.

| NanoBREAT BRAF_V600E |                |                 |            |            |                   |            |            |                    |            |            |
|----------------------|----------------|-----------------|------------|------------|-------------------|------------|------------|--------------------|------------|------------|
|                      |                | Bafetinib (mBU) |            |            | Abemaciclib (mBU) |            |            | Belvarafenib (mBU) |            |            |
| Conc.                | Conc. (log 10) | Response 1      | Response 2 | Response 3 | Response 1        | Response 2 | Response 3 | Response 1         | Response 2 | Response 3 |
| 0                    | #NUM!          | 5.33638492      | 5.53715947 | 5.74809842 | 6.52772549        | 4.80861318 | 4.61630598 | 6.18910475         | 5.52460832 | 5.2892683  |
| 1.016E-09            | -8.9931063     | 6.07896771      | 5.91532471 | 6.97722597 | 6.08293452        | 5.39010574 | 5.27806244 | 5.40874768         | 6.17269327 | 5.46227386 |
| 3.04E-09             | -8.5171264     | 5.39190522      | 5.99447881 | 5.90242629 | 6.19982835        | 5.86573776 | 4.97257656 | 5.77847081         | 6.16186375 | 5.57299865 |
| 9.14E-09             | -8.0390538     | 5.2048433       | 6.30915437 | 6.08070695 | 6.52705614        | 5.22476852 | 6.11906738 | 2.4511827          | 4.8740865  | 4.45457095 |
| 2.74E-08             | -7.5622494     | 5.59297462      | 6.29859681 | 5.28191939 | 5.88861626        | 5.39667028 | 5.64593773 | 2.03523839         | 3.10841126 | 3.2001538  |
| 8.24E-08             | -7.0840728     | 3.86437925      | 5.35295135 | 4.29116974 | 6.23030069        | 5.57039729 | 5.71447366 | 0.03125875         | 1.02366879 | 0.7676262  |
| 2.46E-07             | -6.6090649     | 2.18990768      | 3.25301082 | 2.74688389 | 5.4425841         | 5.02745995 | 5.78499709 | -0.1859074         | 0.73042948 | 0.22908728 |
| 0.00000074           | -6.1307683     | 1.0178843       | 1.77013328 | 1.71893831 | 6.11209876        | 5.6023338  | 5.78441447 | -0.3336585         | 0.58008964 | 0.27599117 |
| 0.00000222           | -5.653647      | -0.0225809      | 0.9859748  | 0.10193503 | 6.50798001        | 4.7763717  | 5.71491838 | -0.6425143         | 0.57539389 | 0.52284339 |
| 0.00000666           | -5.1765258     | -0.0614731      | 0.89476916 | 0.19973177 | 7.21915738        | 6.14606683 | 7.30966575 | -0.3404072         | 0.15181606 | 0.15955778 |
| 0.00002              | -4.69897       | 0.31041542      | 1.27076932 | 0.32975827 | 7.16622475        | 7.40829925 | 6.98164257 | -0.029289          | 0.08480661 | 0.07154295 |

**Table S4.** Raw data of kinase hotspot target validation assay, related to Figure 5.

| <b>Kinase Profiling Report for:</b> | <b>BRAF</b>        |                    |                    |                  |                  |                  | <b>[ATP](<math>\mu</math>M):</b> | <b>10</b>              |
|-------------------------------------|--------------------|--------------------|--------------------|------------------|------------------|------------------|----------------------------------|------------------------|
| <b>Conc.(M)</b>                     | <b>Abemaciclib</b> | <b>Abemaciclib</b> | <b>Abemaciclib</b> | <b>Bafetinib</b> | <b>Bafetinib</b> | <b>Bafetinib</b> | <b>GW5074</b>                    | <b>GW5074 Conc.(M)</b> |
| <b>1.00E-04</b>                     | 80715              | 84419              | 79180              | -2031            | -4443            | -5375            | -6052                            | <b>2.00E-05</b>        |
| <b>3.33E-05</b>                     | 149786             | 147694             | 156034             | -1682            | -3885            | -5622            | -4800                            | <b>6.67E-06</b>        |
| <b>1.11E-05</b>                     | 226330             | 255462             | 267275             | -4434            | -6823            | -5568            | -4421                            | <b>2.22E-06</b>        |
| <b>3.70E-06</b>                     | 358606             | 346775             | 385519             | -6456            | -6266            | -3820            | 4038                             | <b>7.41E-07</b>        |
| <b>1.23E-06</b>                     | 409213             | 413339             | 430776             | -848             | -1857            | -2842            | 16162                            | <b>2.47E-07</b>        |
| <b>4.12E-07</b>                     | 456265             | 441384             | 489258             | 24033            | 23657            | 23139            | 42661                            | <b>8.23E-08</b>        |
| <b>1.37E-07</b>                     | 525557             | 481983             | 539703             | 102191           | 112396           | 109556           | 143045                           | <b>2.74E-08</b>        |
| <b>4.57E-08</b>                     | 552216             | 544026             | 572315             | 276285           | 259062           | 256632           | 365438                           | <b>9.14E-09</b>        |
| <b>1.52E-08</b>                     | 516129             | 545563             | 562423             | 391487           | 383164           | 368225           | 510805                           | <b>3.05E-09</b>        |
| <b>5.08E-09</b>                     | 539302             | 534184             | 562684             | 509419           | 494436           | 477746           | 595780                           | <b>1.02E-09</b>        |
| <b>DMSO</b>                         | 595696             | 584900             | 611632             | 598580           | 606738           | 601776           | 571292                           | <b>DMSO</b>            |

**(Continue) Table S4.** Raw data of kinase hotspot target validation assay, related to Figure 5.

| <b>Kinase Profiling Report for:</b> | <b>CK2a2</b>       |                    |                    |                  |                  |                  | <b>[ATP](<math>\mu</math>M):</b> | <b>10</b>              |
|-------------------------------------|--------------------|--------------------|--------------------|------------------|------------------|------------------|----------------------------------|------------------------|
| <b>Conc.(M)</b>                     | <b>Abemaciclib</b> | <b>Abemaciclib</b> | <b>Abemaciclib</b> | <b>Bafetinib</b> | <b>Bafetinib</b> | <b>Bafetinib</b> | <b>Staurosporine</b>             | <b>Stauro Conc.(M)</b> |
| <b>1.00E-04</b>                     | 7297               | 8941               | 5444               | 458598           | 438803           | 497560           | 78271                            | <b>2.00E-05</b>        |
| <b>3.33E-05</b>                     | 6042               | 2659               | 5092               | 683213           | 645269           | 691405           | 147138                           | <b>5.00E-06</b>        |
| <b>1.11E-05</b>                     | 10836              | 12563              | 9963               | 915233           | 969850           | 949722           | 367327                           | <b>1.25E-06</b>        |
| <b>3.70E-06</b>                     | 25017              | 21513              | 25367              | 923466           | 606108           | 912391           | 579509                           | <b>3.13E-07</b>        |
| <b>1.23E-06</b>                     | 57688              | 57174              | 61108              | 1093698          | 1014825          | 1059729          | 879043                           | <b>7.81E-08</b>        |
| <b>4.12E-07</b>                     | 135849             | 121083             | 133100             | 1086069          | 1086189          | 1050479          | 979504                           | <b>1.95E-08</b>        |
| <b>1.37E-07</b>                     | 322631             | 305443             | 284817             | 1144749          | 1143367          | 1123120          | 1074994                          | <b>4.88E-09</b>        |
| <b>4.57E-08</b>                     | 539792             | 491428             | 494882             | 1069922          | 1089055          | 1118575          | 1029417                          | <b>1.22E-09</b>        |
| <b>1.52E-08</b>                     | 780197             | 723043             | 744052             | 1050756          | 1042893          | 1075383          | 1037887                          | <b>3.05E-10</b>        |
| <b>5.08E-09</b>                     | 971791             | 923850             | 921151             | 1069341          | 1026662          | 1060508          | 1028017                          | <b>7.63E-11</b>        |
| <b>DMSO</b>                         | 1088765            | 1169281            | 1113277            | 1121022          | 1086907          | 1113102          | 1095674                          | <b>DMSO</b>            |
